# Supplementary material for: Mutually Exclusive Expression of COL11A1 by CAFs and Tumour Cells in a Large panCancer and a Salivary Gland Carcinoma Cohort
Source: Springer Nature journal article supplement (doi:10.1007/s12105-021-01370-0), 2021-08-10
Supplement: MOESM1 [file 19559254]

## **Mutually exclusive expression of COL11A1 by CAFs and tumour cells in a large panCancer and a salivary gland carcinoma cohort**

Christoph Arolt 1, Franziska Hoffmann 2, Lisa Nachtsheim 3, Philipp Wolber 3, Orlando Guntinas-Lichius 4, Reinhard Buettner 1, Ferdinand von Eggeling 4,5, Alexander Quaas 1,\*, and Jens Peter Klussmann 3,6,\*

1 Institute of Pathology, Medical Faculty, University of Cologne, 50937 Cologne, Germany; christoph.arolt@uk-koeln.de (C.A.); reinhard.buettner@uk-koeln.de (R.B.); alexander.quaas@uk-koeln.de (A.Q.)

2 Department of Otorhinolaryngology, MALDI Imaging and Innovative Biophotonics, Jena University Hospital, 07747 Jena, Germany; Franziska.Hoffmann@med.uni-jena.de

3 Department of Otorhinolaryngology, Head and Neck Surgery, Medical Faculty, University of Cologne, 50937 Cologne, Germany; lisa.nachtsheim@uk-koeln.de (L.N.); philipp.wolber@uk-koeln.de (P.W.); jens.klussmann@uk-koeln.de (J.P.K.)

4 Department of Otorhinolaryngology, Head and Neck Surgery, Jena University Hospital, 07747 Jena, Germany; Orlando.Guntinas@med.uni-jena.de (O.G.-L.)

5 MALDI Imaging, Core Unit Proteome Analysis, DFG Core Unit Jena Biophotonic and Imaging, Laboratory (JBIL), Jena University Hospital, 07747 Jena, Germany; Ferdinand.von\_Eggeling@med.uni-jena.de (F.v.E.)

6 Centre for Molecular Medicine Cologne (CMMC), University of Cologne, Medical Faculty, University of Cologne, 50937 Cologne, Germany; jens.klussmann@uk-koeln.de (J.P.K.)

Corresponding author: Christoph Arolt, Institute of Pathology, Medical Faculty, University of Cologne; Kerpener Straße 62, 50937 Cologne, Germany; Tel: +49 221 478 4726; Fax: +49 221 478-6360; Email: Christoph.arolt@uk-koeln.de

| CAF <sub>SCOLI1A1</sub> |                     |          |          |    |
|-------------------------|---------------------|----------|----------|----|
| Organ                   | Histology           | negative | positive | n  |
| Prostate                | adeno               | 96.0%    | 4.0%     | 25 |
|                         | total               | 96.0%    | 4.0%     | 25 |
| Breast                  | NST                 | 14.3%    | 85.7%    | 14 |
|                         | medullary           | 0.0%     | 100.0%   | 3  |
|                         | lobular             | 33.3%    | 66.7%    | 3  |
|                         | tubular             | 50.0%    | 50.0%    | 2  |
|                         | mucinous            | 100.0%   | 0.0%     | 2  |
|                         | total               | 25.0%    | 75.0%    | 24 |
| Lung                    | adeno               | 78.6%    | 21.4%    | 14 |
|                         | mucinous            | 100.0%   | 0.0%     | 1  |
|                         | SQC                 | 50.0%    | 50.0%    | 6  |
|                         | LCNEC               | 66.7%    | 33.3%    | 3  |
|                         | total               | 70.8%    | 29.2%    | 24 |
| Colon                   | adeno               | 20.8%    | 79.2%    | 24 |
|                         | total               | 20.8%    | 79.2%    | 24 |
| Cervix                  | adeno               | 100.0%   | 0.0%     | 6  |
|                         | SQC                 | 77.8%    | 22.2%    | 18 |
|                         | total               | 83.3%    | 16.7%    | 24 |
| Stomach                 | diffuse             | 62.5%    | 37.5%    | 8  |
|                         | mixed               | 100.0%   | 0.0%     | 1  |
|                         | intestinal          | 46.7%    | 53.3%    | 15 |
|                         | total               | 54.2%    | 45.8%    | 24 |
| Liver                   | hepatocellular      | 75.0%    | 25.0%    | 24 |
|                         | total               | 75.0%    | 25.0%    | 24 |
| Uterus                  | serous              | 50.0%    | 50.0%    | 2  |
|                         | endometrioid        | 77.3%    | 22.7%    | 22 |
|                         | total               | 75.0%    | 25.0%    | 24 |
| Ovary                   | serous              | 64.3%    | 35.7%    | 14 |
|                         | clear               | 50.0%    | 50.0%    | 2  |
|                         | serous borderline   | 100.0%   | 0.0%     | 3  |
|                         | mucinous borderline | 100.0%   | 0.0%     | 4  |
|                         | total               | 73.9%    | 26.1%    | 23 |
| Esophagus               | adeno               | 63.2%    | 36.8%    | 19 |
|                         | SQC                 | 33.3%    | 66.7%    | 6  |
|                         | total               | 56.0%    | 44.0%    | 25 |
| Lymphnode               | DLBCL               | 80.0%    | 20.0%    | 5  |
|                         | B-CLL               | 100.0%   | 0.0%     | 4  |
|                         | MZL                 | 100.0%   | 0.0%     | 2  |
|                         | FL                  | 100.0%   | 0.0%     | 4  |
|                         | CHL nodular         | 100.0%   | 0.0%     | 2  |
|                         | CHL mixed           | 100.0%   | 0.0%     | 2  |
|                         | plasmacytoma        | 66.7%    | 33.3%    | 3  |
|                         | T peripheral        | 100.0%   | 0.0%     | 1  |
|                         | T angioimmun        | 100.0%   | 0.0%     | 1  |
|                         | T NOS               | 100.0%   | 0.0%     | 1  |
|                         | total               | 92.0%    | 8.0%     | 25 |

**Supplementary table 1:** Percentage of carcinomas from the panCancer cohort with CAF<sub>SCOLI1A1</sub> by histologic type. NST: no special type; SQC: squamous cell carcinoma; LCNEC: large cell neuroendocrine carcinoma; DLBCL: diffuse

large B cell lymphoma; B-CLL: B cell chronic lymphatic leukemia; MZL: marginal zone lymphoma; FL: follicular lymphoma; CHL: classic Hodgkin lymphoma; T: T cell

|           |           | CAF <sub>COL11A1</sub> score |           |                 |           |              |          |                      |
|-----------|-----------|------------------------------|-----------|-----------------|-----------|--------------|----------|----------------------|
|           |           | 0                            | 1         | 2               | 3         | p            | n        | spearman coefficient |
| Grade     | G1        | 66.7%                        | 33.3%     | 0.0%            | 0.0%      | <b>0.021</b> | 24       | 0.478                |
|           | G2        | 57.1%                        | 0.0%      | 0.0%            | 42.9%     |              |          |                      |
|           | G3        | 0.0%                         | 21.4%     | 42.9%           | 35.7%     |              |          |                      |
| pT        | pT1       | 37.5%                        | 25.0%     | 12.5%           | 25.0%     | 0.125        | 24       | 0.323                |
|           | pT2       | 23.1%                        | 15.4%     | 30.8%           | 30.8%     |              |          |                      |
|           | pT3       | 0.0%                         | 0.0%      | 0.0%            | 100.0%    |              |          |                      |
|           | pT4       | 0.0%                         | 0.0%      | 50.0%           | 50.0%     |              |          |                      |
| Ki 67 (%) | 0-9 %     | 66.7%                        | 33.3%     | 0.0%            | 0.0%      | <b>0.001</b> | 22       | 0.657                |
|           | 10-19 %   | 66.7%                        | 0.0%      | 0.0%            | 33.3%     |              |          |                      |
|           | 20-29 %   | 0.0%                         | 33.3%     | 0.0%            | 66.7%     |              |          |                      |
|           | 30-39 %   | 0.0%                         | 0.0%      | 50.0%           | 50.0%     |              |          |                      |
|           | 40-49 %   | 0.0%                         | 0.0%      | 50.0%           | 50.0%     |              |          |                      |
|           | 50-59%    | 0.0%                         | 0.0%      | 0.0%            | 0.0%      |              |          |                      |
|           | 60-69%    | 0.0%                         | 0.0%      | 0.0%            | 100.0%    |              |          |                      |
|           | 70-79 %   | 0.0%                         | 0.0%      | 50.0%           | 50.0%     |              |          |                      |
|           | 80-89 %   | 0.0%                         | 0.0%      | 66.7%           | 33.3%     |              |          |                      |
|           | 80-99 %   | 0.0%                         | 0.0%      | 0.0%            | 0.0%      |              |          |                      |
| pN        | pN0       | 22.2%                        | 22.2%     | 22.2%           | 33.3%     | 0.554        | 23       | 0.133                |
|           | pN1       | 33.3%                        | 0.0%      | 33.3%           | 33.3%     |              |          |                      |
|           | pN2       | 0.0%                         | 0.0%      | 50.0%           | 50.0%     |              |          |                      |
|           | pN3       | 0.0%                         | 0.0%      | 0.0%            | 0.0%      |              |          |                      |
|           | total     | 21.7%(6)                     | 17.4% (4) | 26.1% (6)       | 34.8% (8) |              |          |                      |
|           |           | <b>negative</b>              |           | <b>positive</b> |           | <b>p</b>     | <b>n</b> |                      |
| histology | NST       | 14.3%                        |           | 85.7%           |           | 0.065        | 24       |                      |
|           | medullary | 0.0%                         |           | 100.0%          |           |              |          |                      |
|           | lobular   | 33.3%                        |           | 66.7%           |           |              |          |                      |
|           | tubular   | 50.0%                        |           | 50.0%           |           |              |          |                      |
|           | mucinous  | 100.0%                       |           | 0.0%            |           |              |          |                      |
| AR (%)    | negative  | 0.0%                         |           | 100.0%          |           | 0.462        | 13       |                      |
|           | positive  | 28.6%                        |           | 71.4%           |           |              |          |                      |
| ER (%)    | negative  | 0.0%                         |           | 100.0%          |           | <b>0.012</b> | 22       |                      |
|           | positive  | 54.5%                        |           | 45.5%           |           |              |          |                      |
| PR (%)    | negative  | 14.3%                        |           | 85.7%           |           | 0.137        | 22       |                      |
|           | positive  | 50.0%                        |           | 50.0%           |           |              |          |                      |
| pT        | < pT3     | 28.6%                        |           | 71.4%           |           | 0.546        | 24       |                      |
|           | >= pT3    | 0.0%                         |           | 100.0%          |           |              |          |                      |
| pN        | pN-       | 22.2%                        |           | 77.8%           |           | 1            | 23       |                      |
|           | pN+       | 20.0%                        |           | 80.0%           |           |              |          |                      |
| L         | L0        | 22.2%                        |           | 77.8%           |           | 1            | 23       |                      |
|           | L1        | 20.0%                        |           | 80.0%           |           |              |          |                      |
| V         | V0        | 19.0%                        |           | 81.0%           |           | NA           | 21       |                      |
|           | V1        | 0.0%                         |           | 0.0%            |           |              |          |                      |
| Pn        | Pn0       | 100.0%                       |           | 0.0%            |           | NA           | 21       |                      |
|           | Pn1       | 0.0%                         |           | 0.0%            |           |              |          |                      |
| total     |           | 25 (6)                       |           | 75 (18)         |           |              |          |                      |

**Supplementary table 2:** Percentage of breast carcinomas with correlations of CAF<sub>SCOLI1A1</sub> and clinicopathological features. Upper half: CAF<sub>SCOLI1A1</sub> score in relation to ordinaly scaled pathological attributes. Lower half: Comparison of negative (Score 0) and positive (Score >0) cases with respect to nominally scaled clinicopathological parameters. Given as percentage. absolute numbers in brackets. P values below 0.05 are indicated in bold type. p values below 0.1 are marked in italic. P values of the lower half were calculated with fisher's exact test.

|       |              | CAF <sub>SCOLI1A1</sub> score |         |          |          |       |       |    |                      |
|-------|--------------|-------------------------------|---------|----------|----------|-------|-------|----|----------------------|
|       |              | 0                             | 1       | 2        | 3        | 4     | p     | n  | spearman coefficient |
| Grade | G1           | 100.0%                        | 0.0%    | 0.0%     | 0.0%     | 0.0%  |       |    |                      |
|       | G2           | 85.7%                         | 0.0%    | 14.3%    | 0.0%     | 0.0%  | 0.122 | 15 | 0.466                |
|       | G3           | 42.9%                         | 14.3%   | 28.6%    | 14.3%    | 0.0%  |       |    |                      |
| pT    | pT1          | 100.0%                        | 0.0%    | 0.0%     | 0.0%     | 0.0%  |       |    |                      |
|       | pT2          | 75.0%                         | 0.0%    | 25.0%    | 0.0%     | 0.0%  |       |    |                      |
|       | pT3          | 75.0%                         | 0.0%    | 25.0%    | 0.0%     | 0.0%  | 0.052 | 23 | 0.419                |
|       | pT4a         | 83.3%                         | 16.7%   | 0.0%     | 0.0%     | 0.0%  |       |    |                      |
|       | pT4b         | 25.0%                         | 25.0%   | 25.0%    | 25.0%    | 0.0%  |       |    |                      |
| N     | pN0          | 78.6%                         | 7.1%    | 14.3%    | 0.0%     | 0.0%  |       |    |                      |
|       | pN1          | 75.0%                         | 25.0%   | 0.0%     | 0.0%     | 0.0%  | 0.390 | 23 | 0.185                |
|       | pN2          | 60.0%                         | 0.0%    | 20.0%    | 20.0%    | 0.0%  |       |    |                      |
| CD8   | 0            | 87.5%                         | 0.0%    | 12.5%    | 0.0%     | 0.0%  |       |    |                      |
|       | 1            | 75.0%                         | 8.3%    | 8.3%     | 8.3%     | 0.0%  | 0.282 | 24 | 0.249                |
|       | 2            | 50.0%                         | 25.0%   | 25.0%    | 0.0%     | 0.0%  |       |    |                      |
| total |              | 75 (18)                       | 8.3 (2) | 12.5 (3) | 4.2 (1)  | 0 (0) |       |    |                      |
|       |              | negative                      |         |          | positive |       | p     | n  |                      |
| pT    | <pT3         | 80.0%                         |         |          | 20.0%    |       | 0.653 | 24 |                      |
|       | >=pT3        | 64.3%                         |         |          | 35.7%    |       |       |    |                      |
| pN    | pN-          | 73.3%                         |         |          | 26.7%    |       | 1     | 24 |                      |
|       | pN+          | 66.7%                         |         |          | 33.3%    |       |       |    |                      |
| V     | V0           | 70.6%                         |         |          | 29.4%    |       | 0.333 | 18 |                      |
|       | V1           | 0.0%                          |         |          | 100.0%   |       |       |    |                      |
| L     | L0           | 66.7%                         |         |          | 33.3%    |       | NA    | 18 |                      |
|       | L1           | 0.0%                          |         |          | 0.0%     |       |       |    |                      |
| Pn    | Pn0          | 92.3%                         |         |          | 7.7%     |       | 0.007 | 20 |                      |
|       | Pn1          | 28.6%                         |         |          | 71.4%    |       |       |    |                      |
| Age   | < 65y        | 80.0%                         |         |          | 20.0%    |       | 0.113 | 25 |                      |
|       | >= 65y       | 40.0%                         |         |          | 60.0%    |       |       |    |                      |
| Sex   | women        | 68.8%                         |         |          | 31.3%    |       | 1     | 25 |                      |
|       | men          | 77.8%                         |         |          | 22.2%    |       |       |    |                      |
| TP53  | wildtype     | 88.9%                         |         |          | 11.1%    |       | 0.003 | 24 |                      |
|       | mutated      | 16.7%                         |         |          | 83.3%    |       |       |    |                      |
| CD8   | not inflamed | 76.2%                         |         |          | 23.8%    |       | 0.548 | 25 |                      |
|       | inflamed     | 50.0%                         |         |          | 50.0%    |       |       |    |                      |
| total |              | 72.0 (18)                     |         |          | 28.0 (7) |       |       |    |                      |

**Supplementary table 3:** Percentage of adenoid cystic carcinomas with correlations CAF<sub>COL11A1</sub> and clinicopathological features. Upper half: CAF<sub>COL11A1</sub> score in relation to ordinaly scaled pathological attributes. Lower half: Comparison of negative (Score 0) and positive (Score >0) cases with respect to nominally scaled clinicopathological parameters. Given as percentage. absolute numbers in brackets. P values below 0.05 are indicated in bold type. p values below 0.1 are marked in italic. P values of the lower half were calculated with fisher's exact test.

| CAF <sub>COL11A1</sub> in cases with nodal metastasis |               | n (%)               |          |
|-------------------------------------------------------|---------------|---------------------|----------|
| Entity                                                | Acin          | 1 (7.1)             |          |
|                                                       | ANOS          | 3 (21.4)            |          |
|                                                       | MuEp          | 2 (14.3)            |          |
|                                                       | SaDu          | 8 (57.1)            |          |
| Status                                                | both positive | 5 (35.7)            |          |
|                                                       | both negative | 2 (14.3)            |          |
|                                                       | different     | Primary positive    | 5 (35.7) |
|                                                       |               | Metastasis positive | 2 (14.3) |

**Supplementary table 4:** Concordance of CAF<sub>COL11A1</sub> positivity between primaries and lymphnode metastases for salivary gland carcinomas. acin: acinic cell carcinoma; ANOS: adenocarcinoma not otherwise specified; MuEp: mucoepidermoid carcinoma; SaDu: salivary duct carcinoma

|                          | TC <sub>COL11A1</sub> | n  |
|--------------------------|-----------------------|----|
| Myoepithelial            | 42.2                  | 4  |
| Epithelial-Myoepithelial | 29.6                  | 6  |
| Basal cell               | 16.9                  | 4  |
| Adeno NOS                | 14.6                  | 6  |
| Adenoidcystic            | 13.5                  | 25 |
| Acinic cell              | 10.6                  | 10 |
| Mucoepidermoid           | 1.2                   | 29 |
| Secretory                | 0.1                   | 7  |
| Salivary duct            | 0.0                   | 19 |
| Mean overall             | 8.9                   |    |

**Supplementary table 5:** Mean percentage of TC<sub>COL11A1</sub> per SGC type.
